# Supplementary material for: Decreased expression of the long non-coding RNA FENDRR is associated with poor prognosis in gastric cancer and FENDRR regulates gastric cancer cell metastasis by affecting fibronectin1 expression
Source: J Hematol Oncol. 2014 Aug 29;7:63. doi: 10.1186/s13045-014-0063-7 (PMC4237812; doi:10.1186/s13045-014-0063-7)
Supplement: Additional file 2: Table S2. — Clinical data of all patients involved in the study. [file s13045-014-0063-7-S2.xls]

## Sheet: Sheet1
Suppl.table S2.Clinical data of all patients
PatientNumber	Age	Sex	Location	TumorSize	Histologic differentiation	Invasion depth	TNMstage	Lymphatic metastasis	Regional lymph nodes	Distant metastasis	FENDRRexpression	OS(months)	event	DFS	event(months)	FENDRR relative expression（fold changed tumor/normal）
103	1	1	2	small	moderate	T2	1	Y	N3	N	Low	18	0	18	0	0.0318231
125	1	2	2	large	moderate	T1	1	N	N0	N	Low	29	0	29	0	0.0336092
132	2	2	2	small	undiffer	T3	1	N	N0	N	Low	33	0	33	0	0.0385781
140	1	2	2	large	moderate	T2	1	N	N0	N	Low	24	0	24	0	0.0412346
143	2	1	1	small	undiffer	T4	1	N	N0	N	Low	18	0	18	0	0.045909
155	2	2	2	small	poor	T4	1	N	N0	N	Low	7	0	7	0	0.0484408
18	2	1	2	large	poor	T3	2	N	N0	N	Low	6	0	6	0	0.049721
20	1	2	1	large	undiffer	T4	2	N	N0	N	Low	15	0	15	0	0.0506233
97	1	2	1	large	undiffer	T3	2	Y	N3	N	Low	36	0	36	0	0.0564157
115	1	1	1	small	poor	T4	2	Y	N2	N	Low	22	0	22	0	0.0564157
120	2	1	1	small	poor	T4	2	N	N0	N	Low	36	0	36	0	0.0582118
130	1	1	3	small	moderate	T3	2	N	N0	N	Low	32	0	32	0	0.0588159
133	2	2	1	large	well	T2	2	N	N0	N	Low	34	0	34	0	0.0609807
136	1	1	1	large	moderate	T3	2	N	N0	N	Low	32	0	32	0	0.0620647
141	2	2	2	large	moderate	T2	2	N	N0	N	Low	23	0	23	0	0.0622838
147	2	1	3	large	moderate	T4	2	N	N0	N	Low	21	0	21	0	0.0622838
154	2	1	2	large	undiffer	T3	2	N	N0	N	Low	9	0	9	0	0.0644802
1	1	1	1	small	poor	T3	3	Y	N3	N	Low	20	0	20	0	0.0644802
10	2	2	3	large	poor	T3	3	Y	N3	N	Low	19	0	19	0	0.0660438
11	1	2	3	large	undiffer	T4	3	Y	N2	N	Low	12	0	12	0	0.0701682
17	1	1	2	large	poor	T2	3	Y	N2	N	Low	8	0	8	0	0.072929
31	2	1	2	small	poor	T3	3	Y	N2	N	Low	14	0	14	0	0.0737952
32	2	2	2	small	poor	T4	3	N	N0	N	Low	20	0	20	0	0.0772466
41	1	1	3	small	moderate	T3	3	Y	N2	N	Low	18	0	18	0	0.0789826
57	2	2	1	large	poor	T3	3	Y	N2	N	Low	13	0	13	0	0.0829494
127	2	2	3	small	poor	T3	3	Y	N3	N	Low	36	0	36	0	0.0830429
134	2	2	1	large	moderate	T3	3	Y	N2	N	Low	35	0	35	0	0.0913613
135	1	1	1	small	poor	T4	3	Y	N2	N	Low	36	0	36	0	0.0914748
152	1	1	1	small	moderate	T3	3	Y	N2	N	Low	8	0	8	0	0.0994476
156	2	2	3	large	poor	T2	3	Y	N1	N	Low	6	0	6	0	0.099582
15	1	1	1	large	moderate	T4	4	Y	N2	Y	Low	5	0	5	0	0.113566
110	2	1	3	small	undiffer	T3	1	Y	N3	N	Low	19	0	16	1	0.122091
27	1	2	3	large	poor	T4	2	N	N0	N	Low	15	0	15	1	0.139951
45	1	1	2	large	well	T2	2	N	N0	N	Low	16	0	13	1	0.140146
50	2	1	2	large	poor	T4	2	Y	N2	N	Low	9	0	4	1	0.140543
70	1	1	2	small	moderate	T1	2	N	N0	N	Low	10	0	8	1	0.14234
2	2	1	1	small	moderate	T3	3	Y	N2	N	Low	13	0	11	1	0.147624
44	1	2	2	large	undiffer	T3	3	Y	N1	N	Low	3	0	2	1	0.153361
33	1	1	1	small	undiffer	T1	4	Y	N2	Y	Low	9	0	7	1	0.159643
123	2	2	2	large	moderate	T4	4	Y	N3	Y	Low	28	0	26	1	0.159863
99	1	1	1	large	undiffer	T3	1	N	N0	N	Low	19	1	13	1	0.162988
14	2	2	1	large	poor	T3	2	N	N0	N	Low	3	1	2	1	0.17436
21	1	1	1	large	poor	T3	2	N	N0	N	Low	6	1	3	1	0.183646
26	2	1	3	large	poor	T3	2	N	N0	N	Low	9	1	5	1	0.186082
34	1	1	1	large	poor	T2	2	N	N0	N	Low	7	1	6	1	0.191374
78	1	2	1	large	well	T3	2	Y	N1	N	Low	15	1	14	1	0.194547
83	1	1	1	small	poor	T2	2	N	N0	N	Low	4	1	4	1	0.206387
101	2	1	1	large	moderate	T3	2	Y	N2	N	Low	5	1	5	1	0.20805
106	2	1	2	large	poor	T3	2	N	N0	N	Low	17	1	15	1	0.226728
35	2	1	1	large	moderate	T1	3	N	N0	N	Low	10	1	9	1	0.239004
36	1	2	2	large	poor	T4	3	Y	N2	N	Low	2	1	2	1	0.241994
37	1	2	2	large	poor	T1	3	N	N0	N	Low	3	1	3	1	0.246005
40	2	2	3	large	poor	T2	3	Y	N1	N	Low	4	1	2	1	0.246296
46	2	1	1	small	moderate	T4	3	N	N0	N	Low	2	1	2	1	0.255602
53	1	1	3	large	moderate	T3	3	Y	N3	N	Low	8	1	6	1	0.267855
56	1	2	1	small	well	T3	3	Y	N2	N	Low	11	1	10	1	0.269976
60	1	2	2	large	poor	T3	3	Y	N3	N	Low	14	1	11	1	0.27815
61	2	1	1	small	poor	T4	3	Y	N1	N	Low	13	1	12	1	0.281265
65	1	1	3	small	poor	T4	3	Y	N2	N	Low	18	1	16	1	0.284044
71	1	1	2	small	poor	T4	3	Y	N2	N	Low	13	1	10	1	0.287352
79	2	1	1	large	moderate	T4	3	Y	N2	N	Low	5	1	1	1	0.288172
80	1	1	2	large	poor	T4	3	Y	N3	N	Low	14	1	12	1	0.289013
81	2	1	2	large	moderate	T1	3	N	N2	N	Low	12	1	12	1	0.291327
84	2	1	1	large	poor	T4	3	Y	N2	N	Low	18	1	18	1	0.294985
87	1	1	2	small	poor	T3	3	Y	N3	N	Low	2	1	1	1	0.30842
89	2	1	3	small	undiffer	T2	3	Y	N2	N	Low	14	1	12	1	0.308462
117	2	1	2	small	poor	T3	3	Y	N2	N	Low	23	1	21	1	0.310276
122	1	1	1	small	well	T3	3	Y	N1	N	Low	27	1	21	1	0.315442
139	1	1	2	large	poor	T4	3	Y	N3	N	Low	11	1	8	1	0.319072
142	2	2	1	large	poor	T3	3	Y	N2	N	Low	22	1	22	1	0.325777
145	1	1	2	small	moderate	T2	3	Y	N3	N	Low	19	1	14	1	0.331942
146	2	1	2	large	poor	T3	3	Y	N2	N	Low	20	1	20	1	0.337763
153	2	1	1	large	poor	T4	3	Y	N1	N	Low	10	1	10	1	0.340169
3	1	2	1	small	poor	T4	4	Y	N3	Y	Low	4	1	4	1	0.345705
7	1	2	1	large	poor	T4	4	Y	N3	Y	Low	2	1	2	1	0.34607
12	2	1	1	small	well	T3	4	Y	N2	Y	Low	11	1	11	1	0.351749
38	2	1	1	small	poor	T3	4	Y	N3	Y	Low	8	1	8	1	0.355363
72	1	1	1	large	poor	T2	4	Y	N2	Y	Low	7	1	7	1	0.364233
98	2	1	1	small	poor	T4	4	Y	N3	Y	Low	6	1	6	1	0.367685
9	1	1	3	small	poor	T1	1	N	N0	N	High	35	0	35	0	0.376778
16	2	2	2	large	moderate	T1	1	N	N0	N	High	13	0	13	0	0.378849
19	2	1	1	large	moderate	T2	1	N	N0	N	High	36	0	36	0	0.386093
42	1	1	1	small	moderate	T4	1	N	N0	N	High	32	0	32	0	0.393302
43	2	2	1	small	poor	T1	1	N	N0	N	High	36	0	36	0	0.397768
104	1	2	2	large	poor	T1	1	N	N0	N	High	21	0	21	0	0.397988
105	2	2	2	small	poor	T2	1	N	N0	N	High	21	0	21	0	0.4
113	2	2	1	small	poor	T1	1	N	N0	N	High	22	0	22	0	0.417544
121	1	1	1	large	undiffer	T1	1	N	N0	N	High	27	0	27	0	0.42519
151	2	1	1	small	moderate	T2	1	N	N0	N	High	35	0	35	0	0.445964
23	1	2	2	small	well	T4	2	Y	N1	N	High	36	0	36	0	0.456621
28	1	2	1	small	poor	T4	2	Y	N1	N	High	6	0	6	0	0.482939
30	2	1	1	small	moderate	T4	2	Y	N1	N	High	33	0	33	0	0.484645
52	1	2	2	large	moderate	T1	2	N	N0	N	High	36	0	36	0	0.487872
54	2	1	3	large	poor	T2	2	Y	N1	N	High	36	0	36	0	0.500104
58	2	1	2	small	poor	T2	2	N	N0	N	High	36	0	36	0	0.512049
66	1	1	3	small	undiffer	T2	2	N	N0	N	High	36	0	36	0	0.51943
69	2	2	2	large	poor	T2	2	Y	N1	N	High	32	0	32	0	0.520536
77	2	1	2	large	moderate	T1	2	N	N0	N	High	35	0	35	0	0.558644
92	2	1	2	small	moderate	T2	2	N	N0	N	High	36	0	36	0	0.566866
100	1	2	1	small	well	T2	2	N	N0	N	High	24	0	22	0	0.571568
111	1	1	1	large	undiffer	T4	2	Y	N3	N	High	21	0	21	0	0.61628
112	1	1	1	small	moderate	T2	2	N	N0	N	High	29	0	29	0	0.643941
128	2	1	3	large	poor	T2	2	N	N0	N	High	9	0	9	0	0.68302
131	1	1	2	large	poor	T1	2	Y	N2	N	High	10	0	10	0	0.719025
158	2	1	3	large	undiffer	T4	2	N	N0	N	High	32	0	32	0	0.744839
49	1	1	1	large	moderate	T3	3	Y	N3	N	High	7	0	7	0	0.753276
51	2	2	2	small	poor	T2	3	Y	N1	N	High	34	0	34	0	0.769231
64	2	2	3	small	moderate	T1	3	N	N0	N	High	34	0	34	0	0.817902
74	1	2	1	large	moderate	T1	3	Y	N2	N	High	16	0	15	0	0.929805
75	1	1	2	small	moderate	T2	3	N	N0	N	High	27	0	27	0	1.00586
96	2	2	1	small	moderate	T2	3	N	N0	N	High	18	0	18	0	1.02451
109	2	1	3	small	poor	T1	3	N	N0	N	High	20	0	20	0	1.04247
116	1	1	2	large	poor	T1	3	Y	N3	N	High	33	0	33	0	1.04247
129	2	1	3	small	moderate	T4	4	Y	N2	Y	High	31	0	31	0	1.04972
138	2	1	1	small	poor	T3	4	Y	N2	Y	High	33	0	33	0	1.07549
107	1	1	3	large	moderate	T1	2	N	N0	N	High	35	1	35	0	1.08108
48	2	1	1	small	moderate	T2	1	N	N0	N	High	20	0	18	1	1.3
88	2	1	3	small	undiffer	T1	1	N	N0	N	High	13	0	11	1	1.39959
108	1	2	3	large	moderate	T2	1	Y	N1	N	High	25	0	23	1	1.45902
22	2	1	1	small	undiffer	T3	2	Y	N1	N	High	36	0	32	1	1.49228
119	2	1	2	small	moderate	T3	2	N	N0	N	High	24	0	24	1	1.5
144	1	1	1	large	well	T1	2	N	N0	N	High	16	0	16	1	1.6
148	2	2	3	small	poor	T1	2	N	N0	N	High	17	0	17	1	1.69359
91	1	2	2	small	poor	T2	3	Y	N1	N	High	28	0	28	1	1.75108
114	2	2	1	large	moderate	T3	4	Y	N2	Y	High	17	0	15	1	1.8
90	1	2	3	large	moderate	T4	4	Y	N3	N	High	30	0	25	1	1.9
8	2	1	1	small	moderate	T2	1	N	N0	N	High	8	1	1	1	2.15846
47	1	2	1	small	poor	T1	1	N	N0	N	High	14	1	12	1	2.18038
63	2	1	3	small	moderate	T2	1	N	N0	N	High	8	1	6	1	2.2
67	2	2	3	small	well	T1	1	N	N0	N	High	31	1	28	1	2.3
68	2	1	2	large	moderate	T3	1	Y	N3	N	High	9	1	7	1	2.37549
118	2	1	2	large	moderate	T2	1	N	N0	N	High	11	1	6	1	2.39846
5	1	1	2	large	moderate	T4	2	Y	N3	N	High	15	1	15	1	2.45377
25	1	1	3	small	poor	T2	2	Y	N1	N	High	23	1	23	1	2.67586
29	2	1	1	large	moderate	T3	2	Y	N1	N	High	25	1	25	1	2.75108
39	1	1	1	small	moderate	T3	2	Y	N1	N	High	10	1	10	1	3.06902
55	1	1	3	small	undiffer	T1	2	N	N0	N	High	31	1	28	1	3.28846
62	1	1	1	small	poor	T1	2	N	N0	N	High	10	1	10	1	3.36359
76	2	2	2	large	poor	T2	2	Y	N2	N	High	28	1	28	1	3.85038
93	2	1	3	large	poor	T3	2	Y	N2	N	High	19	1	19	1	3.95902
102	2	1	2	large	poor	T1	2	N	N0	N	High	15	1	15	1	4.47359
124	2	2	2	small	poor	T2	2	Y	N1	N	High	18	1	18	1	4.56377
126	1	2	2	large	poor	T2	2	N	N0	N	High	21	1	19	1	4.60667
13	1	1	1	small	moderate	T3	3	Y	N3	N	High	3	1	3	1	4.90773
73	2	2	1	large	poor	T2	3	N	N0	N	High	12	1	12	1	5.36359
82	1	2	1	large	poor	T1	3	N	N0	N	High	24	1	20	1	5.45377
85	2	2	2	small	moderate	T2	3	Y	N0	N	High	23	1	16	1	5.78586
86	1	2	2	large	moderate	T1	3	N	N0	N	High	16	1	16	1	5.79773
94	1	2	3	small	poor	T1	3	N	N0	N	High	26	1	19	1	6.27667
95	1	1	2	small	poor	T1	3	Y	N1	N	High	13	1	11	1	6.47654
59	1	2	2	small	moderate	T4	4	N	N0	Y	High	29	1	22	1	6.56038
137	2	1	1	large	poor	T1	4	Y	N1	Y	High	12	1	12	1	6.67586
150	1	2	1	large	poor	T1	4	Y	N2	Y	High	29	1	17	1	6.72773
149	2	2	1	large	poor	T2	4	Y	N2	Y	High	22	1	21	1	6.78667
157	2	2	3	large	poor	T3	4	Y	N2	Y	High	5	1	2	1	7.45038
4	2	1	2	large	moderate	T1	1	N	N0	N	High	4	1	1	1	7.67667
6	2	2	1	small	poor	T1	1	N	N0	N	High	5	1	2	1	8.39773
24	2	2	2	large	moderate	T2	1	N	N0	N	High	10	1	5	1	8.44396
Sex:1=male,2=female.
Age:1<50years,2>50years
Location:1=Distal,2=Middle.3=Proximal
event:1=death,0=survial or censors
