# Supplementary material for: Decreased expression of the long non-coding RNA FENDRR is associated with poor prognosis in gastric cancer and FENDRR regulates gastric cancer cell metastasis by affecting fibronectin1 expression
Source: J Hematol Oncol. 2014 Aug 29;7:63. doi: 10.1186/s13045-014-0063-7 (PMC4237812; doi:10.1186/s13045-014-0063-7)
Supplement: Additional file 4: Table S3. — Relative FENDRR expression level and FN1 scores on immunohistochemistry. [file s13045-014-0063-7-S4.xls]

## Sheet: Sheet1
Suppl.tableS3 FENDRR relative expression level and FN1 sores of immunohistochemistry
Patient No.	FENDRR expression（ΔΔCt value)	FN1scores(IHC)
1	0.1012	2
2	0.0851	4
3	0.0842	2
4	0.0836	1
5	0.0658	4
6	0.0619	6
7	0.0608	2
8	0.0569	6
9	0.045	0
10	0.0401	3
11	0.037	1
12	0.0344	3
13	0.0304	4
14	0.0266	1
15	0.0246	4
16	0.0243	6
17	0.0221	3
18	0.0219	6
19	0.0219	2
20	0.0206	4
21	0.0206	6
22	0.0197	6
23	0.0178	2
24	0.0147	3
25	0.0143	6
26	0.0097	9
27	0.0092	6
28	0.0085	6
29	0.0071	9
30	0.007	3
31	0.0068	6
32	0.0049	6
33	0.0043	6
34	0.0041	4
35	0.0039	9
36	0.0032	6
37	0.0028	4
38	0.0024	6
39	0.0024	2
40	0.0019	4
